# Supplementary material
Source: HighWire-hosted journal article supplement (https://bjsm.bmj.com/content/57/14/899)
Supplement: inline-supplementary-material-3 [file inline-supplementary-material-3.pdf]

**Supplementary file 3.** Proposed cluster symptoms and relative rationale for selection.

| <b>Main symptoms</b>            | <b>Question</b>                                                                                                                                                 |                                                                                                                                                                                                                                                                                                                                               |
|---------------------------------|-----------------------------------------------------------------------------------------------------------------------------------------------------------------|-----------------------------------------------------------------------------------------------------------------------------------------------------------------------------------------------------------------------------------------------------------------------------------------------------------------------------------------------|
| Urinary incontinence (Any type) | Do you usually experience urine leakage?                                                                                                                        | PFDI-20, section for urinary symptoms related to UDI-6. Summary of #16,17,18.                                                                                                                                                                                                                                                                 |
| Overactive bladder syndrome     | Do you usually experience urinary urgency (that is a strong sensation of needing to go to the bathroom) usually accompanied by frequent urination and nocturia? | OAB-V8 Overactive Bladder-Validated 8-question Screener. Adaptation from OAB-V8 and definition of OAB: Abrams P, Cardozo L, Fall M, et al. The standardisation of terminology of lower urinary tract function: report from the Standardisation Subcommittee of the International Continence Society. <i>Neurourol Urodyn.</i> 2002;21:167-178 |
| Pelvic Organ Prolapse           | Do you usually have a bulge or something falling out that you can see or feel in your vaginal area?                                                             | National Guideline Alliance (UK). Evidence review for assessing pelvic organ prolapse: Urinary incontinence and pelvic organ prolapse in women: management. London: National Institute for Health and Care Excellence (NICE); April 2019.                                                                                                     |
|                                 | Have you ever had to push in the perineal area with your fingers to start or complete a bowel movement or to start or complete urination?                       | National Guideline Alliance (UK). Evidence review for assessing pelvic organ prolapse: Urinary incontinence and pelvic organ prolapse in women: management. London: National Institute for Health and Care Excellence (NICE); April 2019.                                                                                                     |
| Anal incontinence               | Do you usually lose stool or gas beyond your control?                                                                                                           | PFDI-20, section of colorectal-anal symptoms related to CRAD-8, integration of #10,11.                                                                                                                                                                                                                                                        |
| Pelvic pain                     | Do you usually experience pain or discomfort in the lower abdomen or genital region?                                                                            | PFDI-20, section for urinary symptoms related to UDI-6, #20                                                                                                                                                                                                                                                                                   |
